# Supplementary material for: Turning the tables on cytomegalovirus: targeting viral Fc receptors by CARs containing mutated CH2–CH3 IgG spacer domains
Source: Springer Nature journal article supplement (doi:10.1186/s12967-018-1394-x), 2018-02-08
Supplement: MOESM1 [file 15448812]

**Additional Figure S1**

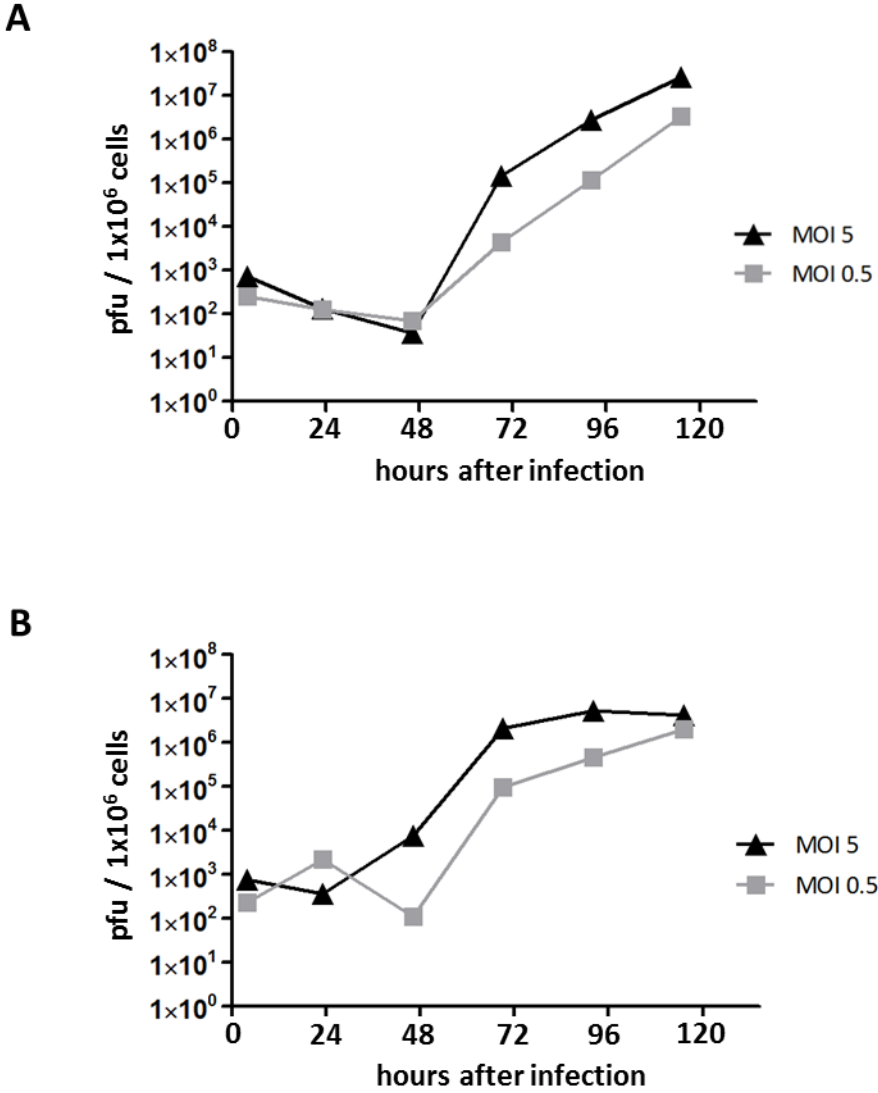

**Replication kinetics of HCMV in HFF.** Shown is the number of infectious virus particles obtained from 1x10<sup>6</sup> HFF at different time points after infection with HCMV (AD169; MOI as indicated). **(A)** Infectious particles released into the supernatant. **(B)** Cell associated infectious particles obtained from centrifuged supernatant after ultrasonic homogenization of the HFF.
